# Supplementary material
Source: HighWire-hosted journal article supplement (https://bmjopenrespres.bmj.com/content/10/1/e002025)
Supplement: inline-supplementary-material-1 [file inline-supplementary-material-1.pdf]

Supplementary Table 1. Institutional review boards numbers approved by each institution

| No | Institution                                                  | IRB numbers                 | Approval date | Study title                                                                                                                  |
|----|--------------------------------------------------------------|-----------------------------|---------------|------------------------------------------------------------------------------------------------------------------------------|
| 1  | Asan Medical Center                                          | 2016-0269                   | 2016/03/10    | Development of indication and assessment of clinical efficacy of ECMO for severe acute respiratory failure patients in Korea |
| 2  | Konkuk University Chungju Hospital                           | KUCH2016-03-014             | 2016/03/29    | Development of indication and assessment of clinical efficacy of ECMO for severe acute respiratory failure patients in Korea |
| 3  | Chungbuk National University Hospital                        | CBNUH<br>2016-03-001        | 2016/05/19    | Development of indication and assessment of clinical efficacy of ECMO for severe acute respiratory failure patients in Korea |
| 4  | Pusan National University Yangsan Hospital                   | 05-2016-008                 | 2016/01/21    | Development of indication and assessment of clinical efficacy of ECMO for severe acute respiratory failure patients in Korea |
| 5  | Samsung Medical Center                                       | SMC<br>2016-02-102-002      | 2016/03/11    | Development of indication and assessment of clinical efficacy of ECMO for severe acute respiratory failure patients in Korea |
| 6  | Jeonbuk National University Hospital                         | CUH<br>2016-03-016-002      | 2016/05/05    | Development of indication and assessment of clinical efficacy of ECMO for severe acute respiratory failure patients in Korea |
| 7  | Seoul National University Hospital                           | H-1605-107-763              | 2016/06/09    | Development of indication and assessment of clinical efficacy of ECMO for severe acute respiratory failure patients in Korea |
| 8  | The Catholic University of Korea Incheon St. Mary's Hospital | OC16RNMI0028                | 2017/04/05    | Development of indication and assessment of clinical efficacy of ECMO for severe acute respiratory failure patients in Korea |
| 9  | Hallym University Sacred Heart Hospital                      | 2016-1051                   | 2016/04/19    | Development of indication and assessment of clinical efficacy of ECMO for severe acute respiratory failure patients in Korea |
| 10 | Seoul Boramae Hospital                                       | 20160223/26-<br>2016-19/032 | 2016/03/11    | Development of indication and assessment of clinical efficacy of ECMO for severe acute respiratory failure patients in Korea |
| 11 | Dongguk University Ilsan Hospital                            | 2016-30                     | 2016/03/24    | Development of indication and assessment of clinical efficacy of ECMO for severe acute respiratory failure patients in Korea |
| 12 | Gangdong Kyunghee University College of Medicine Hospital    | KHNMC<br>2016-07-008        | 2016/07/19    | Development of indication and assessment of clinical efficacy of ECMO for severe acute respiratory failure patients in Korea |
| 13 | Seoul National University Bundang Hospital                   | B-1503/292-004              | 2015/10/19    | Development of indication and assessment of clinical efficacy of ECMO for severe acute respiratory failure patients in Korea |
| 14 | Soonchunhyang University Busok Seoul Hospital                | SCHUH<br>2016-03-005-004    | 2016/05/26    | Development of indication and assessment of clinical efficacy of ECMO for severe acute respiratory failure patients in Korea |
| 15 | University of Ulsan Hospital                                 | UUH<br>2016-06-015          | 2016/06/23    | Development of indication and assessment of clinical efficacy of ECMO for severe acute respiratory failure patients in Korea |
| 16 | The Catholic University of Korea Seoul St. Mary's Hospital   | KIRB-00590_1-<br>001        | 2016/06/02    | Development of indication and assessment of clinical efficacy of ECMO for severe acute respiratory failure patients in Korea |

Supplementary Table 2. Description of electronic health records (EHR) variables used in analysis

| Category         | Features                 | Definition                                                                                                                                 | ALL (n = 51) | EHR (n = 40) |
|------------------|--------------------------|--------------------------------------------------------------------------------------------------------------------------------------------|--------------|--------------|
| Demographic      | Age                      | Age on admission to hospital                                                                                                               | Y            | Y            |
|                  | Sex                      | Men/ Women                                                                                                                                 | Y            | Y            |
|                  | Height                   | Height on admission to hospital                                                                                                            | Y            | Y            |
|                  | Weight                   | Weight on admission to hospital                                                                                                            | Y            | Y            |
|                  | Body mass index (BMI)    | BMI on admission to hospital                                                                                                               | Y            | Y            |
|                  | Body size are (BSA)      | BSA on admission to hospital                                                                                                               | Y            | Y            |
| Vital signs      | Systolic blood pressure  | Systolic blood pressure at the closest value to the moment of ECMO commencement                                                            | Y            | Y            |
|                  | Diastolic blood pressure | Diastolic blood pressure at the closest value to the moment of ECMO commencement                                                           | Y            | Y            |
|                  | Mean arterial pressure   | Diastolic blood pressure + 1/3(systolic blood pressuer – diastolic blood pressure) at the closest value to the moment of ECMO commencement | Y            | Y            |
|                  | Heart rate               | Heart rate at the closest value to the moment of ECMO commencement                                                                         | Y            | Y            |
|                  | Respiratory rate         | Respiratory rate at the closest value to the moment of ECMO placement                                                                      | Y            | Y            |
| Laboratory tests | Hemoglobin               | Hemoglobin at the closest value to the moment of ECMO commencement                                                                         | Y            | Y            |

|               |                            |                                                                                                                                                      |   |   |
|---------------|----------------------------|------------------------------------------------------------------------------------------------------------------------------------------------------|---|---|
|               | Sodium bicarbonate         | Bicarbonate infusion before ECMO                                                                                                                     | Y | Y |
|               | Sodium                     | Na at the closest value to the moment of ECMO commencement                                                                                           | Y | Y |
|               | Potassium                  | K at the closest value to the moment of ECMO commencement                                                                                            | Y | Y |
|               | Total bilirubin            | Total bilirubin at the closest value to the moment of ECMO commencement                                                                              | Y | Y |
|               | Aspartate aminotransferase | Aspartate aminotransferase at the closest value to the moment of ECMO commencement                                                                   | Y | Y |
|               | Alanine aminotransferase   | Alanine aminotransferase at the closest value to the moment of ECMO commencement                                                                     | Y | Y |
|               | Blood urea nitrogen        | Blood urine nitrogen at the closest value to the moment of ECMO commencement                                                                         | Y | Y |
|               | Creatinine                 | Creatinine at the closest value to the moment of ECMO commencement                                                                                   | Y | Y |
|               | Platelet                   | Platelets at the closest value to the moment of ECMO commencement                                                                                    | Y | Y |
| Comorbidities | Immunocompromised status   | “Immunocompromised” is defined as hematological malignancies, solid tumor, solid organ transplantation, human immunodeficiency virus, and cirrhosis. | Y | Y |

|           |                                    |                                                                                                                                                     |   |   |
|-----------|------------------------------------|-----------------------------------------------------------------------------------------------------------------------------------------------------|---|---|
|           | Central nervous system dysfunction | “Central nervous system dysfunction” diagnosis combined neurotrauma, stroke, encephalopathy, cerebral embolism, and seizure and epileptic syndrome. | Y | Y |
|           | Acute nonpulmonary infiltrates     | Acute associated (nonpulmonary) infection” is defined as another bacterial, viral, parasitic, or fungal infection that did not involve the lung.    | Y | N |
|           | Neuromuscular blocking agents      | Neuromuscular blockade agents before ECMO                                                                                                           | Y | Y |
|           | Respiratory diagnosis group        | Etiology of respiratory failure                                                                                                                     | Y | Y |
| Blood gas | Arterial pressure CO2              | PaCO2 at the closest value to the moment of ECMO placement                                                                                          | Y | Y |
|           | Arterial pressure O2               | PaO2 at the closest value to the moment of ECMO placement                                                                                           | Y | Y |
|           | Bicarbonate                        | HCO3 at the closest value to the moment of ECMO placement                                                                                           | Y | Y |
|           | Power of hydrogen                  | pH at the closest value to the moment of ECMO placement                                                                                             | Y | Y |
|           | Arterial saturation O2%            | SaO2% at the closest value to the moment of ECMO placement                                                                                          | Y | Y |

|                        |                                        |                                                                                                   |   |   |
|------------------------|----------------------------------------|---------------------------------------------------------------------------------------------------|---|---|
|                        | Mechanical ventilation                 | Use of mechanical ventilation before ECMO                                                         | Y | Y |
|                        | Minute ventilation                     | Tidal volume (Vt) in mL x respiratory rate in resp/min                                            | Y | Y |
|                        | PF ratio                               | PaO <sub>2</sub> / FIO <sub>2</sub> at the closest value to the moment of ECMO placement          | Y | Y |
|                        | Peak inspiratory pressure              | Peak inspiratory pressure at the closest value to the moment of ECMO commencement                 | Y | Y |
| Mechanical ventilation | Positive end expiratory pressure       | Positive end-expiratory pressure obtained at the closest value to the moment of ECMO commencement | Y | Y |
|                        | MV time before initiation of ECMO      | Duration of mechanical ventilation before ECMO                                                    | Y | Y |
|                        | Plateau pressure >30cmH <sub>2</sub> O | Plateau airway pressure greater than 30 cm H <sub>2</sub> O before ECMO                           | Y | Y |
|                        | Year                                   | Year of ECMO treatment                                                                            | Y | N |
|                        | Center                                 | ECMO centers                                                                                      | Y | N |
| ECMO management        | High volume ECMO > 20 yr               | Hospitals with more than 20 ECMO cases per year                                                   | Y | N |
|                        | APACHE II score                        | APACHE II score at the closest value to the moment of ECMO placement                              | Y | N |
| ICU mortality scores   | Pre SOFA score                         | SOFA score before admission to intensive care unit                                                | Y | N |
|                        | In-hospital mortality                  | Deaths occurring during the hospital stay                                                         | Y | Y |
| Outcome                | 90-day mortality                       | Deaths within 90 days after ECMO initiation                                                       | Y | Y |
|                        | Bridge to transplant                   | Patients who received ECMO as a bridge to transplant                                              | Y | N |
| Others                 | Nitric oxide gas                       | Nitric oxide use before ECMO                                                                      | Y | Y |

---

|                                      |                                                              |   |   |
|--------------------------------------|--------------------------------------------------------------|---|---|
| Cardiac arrest                       | Cardiac arrest before ECMO                                   | Y | N |
| Steroid                              | Steroid at the closest value to the moment of ECMO placement | Y | Y |
| Continuous renal replacement therapy | Continuous renal replacement therapy before ECMO             | Y | Y |
| Prone positioning                    | Prone positioning before ECMO                                | Y | N |
| ECMO transfer                        | Transferred for ECMO                                         | Y | N |

---

Supplementary Table 3. Baseline characteristics of VV-ECMO treated patients in the internal and external validation set

|                                                        | Internal validation (N = 111) | External validation (N = 78) | P-value |
|--------------------------------------------------------|-------------------------------|------------------------------|---------|
| Age (years)                                            | 53.1 (14.7)                   | 58.5 (13.7)                  | 0.04    |
| Sex (Male)                                             | 75 (67.6%)                    | 49 (62.8%)                   | 0.796   |
| Height (cm)                                            | 166 (8.48)                    | 164 (8.81)                   | 0.289   |
| Weight (kg)                                            | 63.7 (13.3)                   | 66.2 (16.5)                  | 0.512   |
| Body mass index (kg/m <sup>2</sup> )                   | 23.1 (4.00)                   | 24.6 (5.20)                  | 0.098   |
| BSA (m <sup>2</sup> )                                  | 1.69 (0.257)                  | 1.72 (0.241)                 | 0.646   |
| Immunocompromised status                               | 30 (27.0%)                    | 20 (25.6%)                   | 0.96    |
| CNS dysfunction                                        | 6 (5.4%)                      | 10 (12.8%)                   | 0.211   |
| Sodium bicarbonate infusion                            | 10 (9.0%)                     | 17 (21.8%)                   | 0.017   |
| Cardiac arrest                                         | 14 (12.6%)                    | 4 (5.1%)                     | 0.226   |
| Pre SOFA score                                         | 11.3 (3.97)                   | 13.9 (2.89)                  | <0.001  |
| NMB agent                                              | 47 (42.3%)                    | 75 (96.2%)                   | <0.001  |
| Etiology of respiratory failure                        |                               |                              | <0.001  |
| Viral pneumonia                                        | 18 (16.2%)                    | 27 (34.6%)                   |         |
| Bacterial pneumonia                                    | 31 (27.9%)                    | 4 (5.1%)                     |         |
| COPD/ asthma                                           | 2 (1.8%)                      | 1 (1.3%)                     |         |
| Trauma/ burn                                           | 5 (4.5%)                      | 0 (0%)                       |         |
| Asphyxia                                               | 1 (0.9%)                      | 4 (5.1%)                     |         |
| AE-ILD                                                 | 11 (9.9%)                     | 0 (0%)                       |         |
| Chronic respiratory failure                            | 3 (2.7%)                      | 0 (0%)                       |         |
| Other respiratory failure                              | 40 (36.0%)                    | 42 (53.8%)                   |         |
| Positive end-expiratory pressure (cm H <sub>2</sub> O) | 9.01 (3.55)                   | 7.44 (2.92)                  | 0.008   |
| Peak inspiratory pressure (cm H <sub>2</sub> O)        | 29.0 (6.06)                   | 25.9 (9.03)                  | 0.033   |
| PF ratio                                               | 78.5 (38.4)                   | 62.9 (31.9)                  | 0.018   |
| Minute ventilation (L/min)                             | 9.96 (3.92)                   | 9.45 (5.04)                  | 0.777   |
| Respiratory rate (/min)                                | 23.2 (6.77)                   | 24.6 (7.29)                  | 0.383   |
| MV time before ECMO                                    |                               |                              | 0.092   |
| < 48 hrs                                               | 70 (63.1%)                    | 34 (43.6%)                   |         |
| > 7 days                                               | 22 (19.8%)                    | 23 (29.5%)                   |         |

|                          |             |             |       |
|--------------------------|-------------|-------------|-------|
| 48 hrs - 7 days          | 17 (15.3%)  | 21 (26.9%)  |       |
| PaCO <sub>2</sub> (mmHg) | 57.3 (25.4) | 53.1 (26.1) | 0.558 |
| PaO <sub>2</sub> (mmHg)  | 70.0 (22.0) | 96.9 (78.5) | 0.006 |
| SaO <sub>2</sub> (%)     | 85.4 (12.9) | 89.1 (11.6) | 0.141 |
| Hemoglobin (g/dL)        | 10.9 (2.28) | 10.9 (2.28) | 1     |
| TBIL (μmol/L)            | 1.98 (2.87) | 3.90 (13.2) | 0.412 |
| Creatinine (mg/dL)       | 1.36 (1.52) | 1.73 (4.94) | 0.793 |
| Platelet count           | 155 (114)   | 174 (105)   | 0.547 |
| In-hospital mortality    | 70 (63.1%)  | 40 (51.3%)  | 0.271 |
| 90-day mortality         | 64 (57.7%)  | 38 (48.7%)  | 0.479 |

Data are n(%) or mean (SD), unless otherwise specified.

MV time before ECMO = Mechanical Ventilation-ECMO interval

PF ratio = PaO<sub>2</sub>/FiO<sub>2</sub> (mmHg)

TBIL (μmol/L) = Total bilirubin

PEEP = Positive end-expiratory pressure



Supplementary Table 4. Metrics for assessment of predictive performance of six ML algorithms with all features for prediction of 90-day mortality in the test set

| Models | AUROC              | AUPRC              | Sensitivity        | Specificity        | PPV                | NPV                | F1-score           |
|--------|--------------------|--------------------|--------------------|--------------------|--------------------|--------------------|--------------------|
| LR     | 0.73 (0.63 - 0.82) | 0.79 (0.67 - 0.88) | 0.73 (0.62 - 0.84) | 0.64 (0.49 - 0.78) | 0.73 (0.62 - 0.84) | 0.64 (0.50 - 0.76) | 0.73 (0.64 - 0.82) |
| SVM    | 0.76 (0.66 - 0.85) | 0.77 (0.65 - 0.89) | 0.73 (0.62 - 0.83) | 0.60 (0.45 - 0.74) | 0.71 (0.60 - 0.82) | 0.62 (0.47 - 0.76) | 0.72 (0.62 - 0.80) |
| RF     | 0.78 (0.69 - 0.87) | 0.83 (0.73 - 0.91) | 0.75 (0.63 - 0.86) | 0.64 (0.50 - 0.79) | 0.74 (0.63 - 0.85) | 0.65 (0.51 - 0.79) | 0.74 (0.65 - 0.82) |
| XGB    | 0.79 (0.69 - 0.87) | 0.82 (0.72 - 0.91) | 0.97 (0.91 - 1.0)  | 0.32 (0.19 - 0.46) | 0.66 (0.56 - 0.76) | 0.88 (0.69 - 1.0)  | 0.79 (0.71 - 0.85) |
| MLP    | 0.75 (0.64 - 0.84) | 0.78 (0.66 - 0.89) | 0.63 (0.50 - 0.73) | 0.66 (0.52 - 0.81) | 0.71 (0.59 - 0.83) | 0.56 (0.43 - 0.69) | 0.67 (0.56 - 0.76) |
| LGB    | 0.80 (0.71 - 0.88) | 0.82 (0.71 - 0.91) | 0.91 (0.83 - 0.97) | 0.51 (0.37 - 0.66) | 0.72 (0.61 - 0.82) | 0.80 (0.65 - 0.94) | 0.80 (0.72 - 0.87) |

LR = Logistic Regression. SVM = Support Vector Machine. RF = Random Forest. XGB: Extreme Gradient Boosting. MLP: Multi-layer Perceptron. LGB: Light Gradient Boosting. AUROC: area under the receiver operating characteristic curve. AUPRC: area under the precision-recall curve. PPV: positive predictive value. NPV: negative predictive value. Better performance between models with EHR and all features is marked in bold. All numbers are presented with 95% confidence interval.

Supplementary Table 5. Metrics for assessment of predictive performance of ML algorithms for prediction of in-hospital mortality in the test set

|     | Models | AUROC              | AUPRC              | Sensitivity        | Specificity        | PPV                | NPV                | F1-score           |
|-----|--------|--------------------|--------------------|--------------------|--------------------|--------------------|--------------------|--------------------|
| LR  | EHR    | 0.75 (0.65 - 0.85) | 0.80 (0.69 - 0.90) | 0.94 (0.89 - 0.99) | 0.41 (0.28 - 0.52) | 0.72 (0.65 - 0.80) | 0.81 (0.65 - 0.94) | 0.82 (0.76 - 0.86) |
|     | All    | 0.77 (0.68 - 0.86) | 0.85 (0.77 - 0.92) | 0.78 (0.68 - 0.87) | 0.60 (0.45 - 0.74) | 0.76 (0.66 - 0.86) | 0.63 (0.48 - 0.77) | 0.77 (0.69 - 0.84) |
| SVM | EHR    | 0.74 (0.63 - 0.83) | 0.79 (0.68 - 0.89) | 0.99 (0.95 - 1.00) | 0.17 (0.07 - 0.28) | 0.66 (0.57 - 0.75) | 0.88 (0.57 - 1.00) | 0.79 (0.72 - 0.85) |
|     | All    | 0.75 (0.65 - 0.85) | 0.81 (0.70 - 0.91) | 0.96 (0.90 - 1.00) | 0.31 (0.18 - 0.47) | 0.70 (0.60 - 0.79) | 0.81 (0.60 - 1.00) | 0.81 (0.74 - 0.87) |
| RF  | EHR    | 0.78 (0.68 - 0.87) | 0.84 (0.74 - 0.92) | 0.96 (0.90 - 1.00) | 0.48 (0.33 - 0.64) | 0.75 (0.66 - 0.84) | 0.87 (0.71 - 1.00) | 0.84 (0.78 - 0.90) |
|     | All    | 0.81 (0.73 - 0.88) | 0.86 (0.76 - 0.93) | 0.97 (0.93 - 1.00) | 0.26 (0.14 - 0.41) | 0.68 (0.59 - 0.78) | 0.85 (0.62 - 1.00) | 0.80 (0.73 - 0.87) |
| XGB | EHR    | 0.80 (0.70 - 0.88) | 0.85 (0.74 - 0.93) | 0.87 (0.78 - 0.94) | 0.57 (0.32 - 0.63) | 0.73 (0.64 - 0.82) | 0.69 (0.50 - 0.85) | 0.79 (0.72 - 0.86) |
|     | All    | 0.83 (0.74 - 0.91) | 0.88 (0.79 - 0.95) | 0.88 (0.80 - 0.95) | 0.52 (0.38 - 0.68) | 0.75 (0.66 - 0.84) | 0.73 (0.56 - 0.88) | 0.81 (0.74 - 0.88) |
| MLP | EHR    | 0.77 (0.68 - 0.86) | 0.82 (0.71 - 0.91) | 0.90 (0.83 - 0.97) | 0.41 (0.26 - 0.56) | 0.71 (0.62 - 0.81) | 0.71 (0.53 - 0.90) | 0.80 (0.72 - 0.86) |
|     | All    | 0.77 (0.68 - 0.86) | 0.83 (0.72 - 0.92) | 0.88 (0.81 - 0.96) | 0.52 (0.38 - 0.68) | 0.75 (0.66 - 0.84) | 0.73 (0.57 - 0.88) | 0.81 (0.67 - 0.83) |
| LGB | EHR    | 0.79 (0.70 - 0.88) | 0.84 (0.75 - 0.93) | 0.91 (0.84 - 0.97) | 0.48 (0.32 - 0.64) | 0.74 (0.64 - 0.83) | 0.77 (0.63 - 0.90) | 0.82 (0.75 - 0.88) |
|     | All    | 0.80 (0.71 - 0.88) | 0.86 (0.78 - 0.93) | 0.90 (0.82 - 0.96) | 0.48 (0.33 - 0.63) | 0.74 (0.64 - 0.83) | 0.74 (0.56 - 0.90) | 0.81 (0.74 - 0.87) |

LR = Logistic Regression. SVM = Support Vector Machine. RF = Random Forest. XGB: Extreme Gradient Boosting. MLP: Multi-layer Perceptron. LGB: Light Gradient Boosting. AUROC: area under the receiver operating characteristic curve. AUPRC: area under the precision-recall curve. PPV: positive predictive value. NPV: negative predictive value. All numbers are presented with 95% confidence interval.

Supplementary Table 6. Previous studies on prognosis prediction models for patients undergoing VV or VA ECMO

| Model or Author name (year)        | Country | Study Setting    | ECMO mode | Patients Number | MV-related features                      | Comorbidity related features                                                                                                        | Blood gas related features   | Lab tests                                                                 | Other features                                                                                                            | Internal/External AUROC |
|------------------------------------|---------|------------------|-----------|-----------------|------------------------------------------|-------------------------------------------------------------------------------------------------------------------------------------|------------------------------|---------------------------------------------------------------------------|---------------------------------------------------------------------------------------------------------------------------|-------------------------|
| Regression based models            |         |                  |           |                 |                                          |                                                                                                                                     |                              |                                                                           |                                                                                                                           |                         |
| PRESERVE; Schemidt et al. (2013)   | France  | Population based | VV & VA   | 140             | Days of MV<br>PEEP<br>Plateau<br>MV +/-* | Immunocompromised status                                                                                                            | PaO2*<br>FiO2*<br>Platelets* | Bilirubin*<br>Mean arterial pressure*<br>Creatinine*                      | Age<br>BMI<br>Prone positioning<br>Sepsis-related organ failure<br>Glasgow Comma Scale                                    | 0.89 / 0.59<br>- 0.80   |
| PRESET; Hlinder et al. (2017)      | Germany | Hospital based   | VV        | 108             | No                                       | No                                                                                                                                  | No                           | Platelets<br>Lactate                                                      | Mean arterial pressure<br>concentration<br>pH<br>Hospital day pre ECMO                                                    | 0.85 / 0.70             |
| ECMO net; Pappalardo et al. (2012) | Italy   | Population based | VV & VA   | 60              | No                                       | No                                                                                                                                  | No                           | Bilirubin<br>Creatinine<br>Hematocrit                                     | Pre ECMO hospital length of day<br>Mean arterial pressure                                                                 | 0.86 / 0.51<br>- 0.70   |
| RESP; Schemidt et al. (2020)       | Global  | Population based | VV & VA   | 2,355           | Days of MV<br>PIP                        | Immunocompromised status<br>Acute respiratory diagnosis group<br>Central nervous system dysfunction<br>Acute nonpulmonary infection | PaCO2                        | No                                                                        | Age<br>Nueromuscular blockage agents<br>Nitric oxide use<br>Bicarbonate<br>Cardiac arrest                                 | 0.74 / 0.44<br>- 0.92   |
| APACHE II; Knaus et al. (1985)     | US      | Population based | No        | 5,030           | No                                       | Immunocomprised status<br>Acute renal failure (acute kidney injury)                                                                 | FiO2                         | Sodium<br>Potassium<br>Creatinine<br>Hematocrit<br>White blood cell count | Age<br>History or severe organ failure<br>Temperature<br>pH<br>Heart rate/pulse<br>Respiratory rate<br>Glasgow Coma Scale | No / 0.63 - 0.88        |

|                             |                      |                  |         |       |                      |                                                                                                          |                                                                                                    |                                        |                                                                                                                                            |                                                    |
|-----------------------------|----------------------|------------------|---------|-------|----------------------|----------------------------------------------------------------------------------------------------------|----------------------------------------------------------------------------------------------------|----------------------------------------|--------------------------------------------------------------------------------------------------------------------------------------------|----------------------------------------------------|
|                             |                      |                  |         |       |                      |                                                                                                          |                                                                                                    |                                        | Mean arterial pressure                                                                                                                     |                                                    |
| SOFA; Vincent et al. (1996) | Europe North America | Population based | No      | 1,643 | MV +/-               | No                                                                                                       | PaO2<br>FiO2                                                                                       | Platelets<br>Bilirubin<br>Creatinine   | Glasgow Coma Scale<br>Administration of vasoactive agents<br>Mean arterial pressure                                                        | No / 0.49 – 0.79                                   |
| SAVE; Schmidt et al. (2015) | Global               | Population based | VA      | 3,846 | Days of MV<br>PIP    | Myocarditis<br>Congenital heart disease<br>Acute renal failure<br>Chronic renal failure<br>Liver failure | HCO3                                                                                               |                                        | Cardiac arrest<br>Age<br>Weight<br>Refractory (VT/VF)<br>Post heart or lung transplantation<br>CNS dysfunction<br>Diastolic blood pressure | 0.68 / 0.90                                        |
| Enger et al. (2014)         | Germany              | Hospital based   | VV      | 304   | Minute ventilation   | Immunocompromised status (model1, model2)                                                                | FiO2 (model 2)<br>Fibrinogen (model 2)<br>norepinephrine (model 2)<br>C-reactive protein (model 2) | Hemoglobin (model1, model2)<br>Lactate | Age                                                                                                                                        | 0.75 - 0.79 / None (only internal validation done) |
| Roch et al. (2013)          | France               | Hospital based   | VV & VA | 85    | MV +/-               | influenza pneumonia                                                                                      | PaO2*<br>FiO2*<br>Platelets*                                                                       | Bilirubin*<br>Creatinine*              | Age<br>Mean arterial pressure*                                                                                                             | 0.80 / 0.56 - 0.62                                 |
| Hsin et al. (2016)          | China                | Hospital based   | VV      | 107   | Days of MV<br>MV +/- | Immunocompromised status                                                                                 | PaO2<br>FiO2<br>Platelets                                                                          | Bilirubin*<br>Creatinine*              | Mean arterial pressure*                                                                                                                    | 0.78 / None (only internal validation done)        |

|                                                     |         |                  |         |       |                                                                 |                                       |                              |                                                                                                      |                                                                                                              |                                                                                    |
|-----------------------------------------------------|---------|------------------|---------|-------|-----------------------------------------------------------------|---------------------------------------|------------------------------|------------------------------------------------------------------------------------------------------|--------------------------------------------------------------------------------------------------------------|------------------------------------------------------------------------------------|
| Cheng et al. (2016)                                 | China   | Hospital based   | VV      | 116   | Days of MV<br>MV +/-*                                           | Immunocompromised status              | PaO2*<br>FiO2*<br>Platelets* | Bilirubin*<br>Creatinine*                                                                            | Mean arterial pressure*                                                                                      | 0.76 /<br>None (only internal validation done)                                     |
| Liu et al. (2016)                                   | China   | Hospital based   | VV      | 38    | No                                                              | Barotrauma<br>Underlying lung disease | No                           | No                                                                                                   | No                                                                                                           | No / None (only internal validation done)                                          |
| ENCOUR AGE; Muller et al. (2016)                    | France  | Hospital based   | VA      | 138   | No                                                              | No                                    | No                           | Creatinine<br>Prothrombin<br>Lactate                                                                 | Age<br>Sex<br>BMI<br>Glasgow coma scale                                                                      | 0.84 /<br>None (only internal validation done)                                     |
| PREDICT; Wengenmayer et al. (2019)                  | Germany | Hospital based   | VA      | 205   | No                                                              | No                                    | pH                           | Lactate                                                                                              | Bicarbonate                                                                                                  | 0.82 - 0.84 /<br>0.72 -0.74                                                        |
| Magunia et al. (2021)                               | Germany | Population based | VV & VA | 1,039 | MV intubated, PEEP+, PaO2/FiO2 ratio+, Compliance (ml/cm H2O) + | No                                    | No                           | No                                                                                                   | Age, ICU admission, consolidation on chest x-ray +, hypoxemia +, external transfer, Murray lung injury score | 0.73 (balanced accuracy)<br>0.69 (AUPRC) /<br>None (only internal validation done) |
| Machine Learning-Based models other than regression |         |                  |         |       |                                                                 |                                       |                              |                                                                                                      |                                                                                                              |                                                                                    |
| Ayers et al. (2020)                                 | US      | Hospital based   | VA      | 282   | No                                                              | Post cardiotomy, PreECMO CPR          | pH                           | Bilirubin, ALT, AST, Platelet, Phosphorous, WBC, Sodium, Magnesium, Hemoglobin, Hematocrit, Alk phos | Age, Sex                                                                                                     | 0.95 /<br>None (only internal validation done)                                     |

\* Variables included in SOFA model

+ Variables included in Murray lung injury score

Glasgow coma scale: Assessment of the level of consciousness in patients with traumatic brain injury

MV = mechanical ventilation. VV = venovenous. VA = venoarterial. ECMO = extracorporeal membrane oxygenation. AUROC = area under receiver operating characteristic curve. AUPRC = area under precision recall curve. PRESERVE = predicting death for severe acute respiratory distress syndrome on VV ECMO. PRESET = prediction of survival on ECMO therapy-score. RESP = respiratory. VT = Ventricular tachycardia. VF = Ventricular fibrillation. PIP = Peak inspiratory pressure. PEEP = Positive end-expiratory pressure. CNS = Central nervous system.

extracorporeal membrane oxygenation. APACHE II = acute physiology and chronic health evaluation. SOFA: Sepsis-related organ failure assessment score. Acute respiratory diagnosis group: viral pneumonia; bacterial pneumonia; asthma; trauma and burn; aspiration pneumonitis; other acute respiratory diagnoses; nonrespiratory and chronic respiratory diagnoses.

a. Validation on a cohort of 41 patients with acute respiratory distress syndrome (ARDS) b. Validation on a cohort of 99 patients with ARDS. c. Validation on a cohort of 50 patients who underwent ECMO support d. Validation on a cohort of 127 patients who treated with VV-ECMO. e. Validation on a cohort of 122 patients who treated with VV-ECMO for ARDS.

f. Validation on a cohort of 51 patients who received ECMO therapy for ARDS. g. Validation on a cohort of 111 patients who underwent VV-ECMO for ARDS with influenza and non-influenza etiologies. h. Validation on a cohort of 108 patients who underwent VV-ECMO for ARDS. i. Validation on a cohort of 629 patients who underwent VA and VV ecmo therapy. j. Validation on a cohort of 107 patients who received VV-ECMO. k. Validation on a cohort of all patients (n = 23) and pneumonia subgroup (n = 18) who underwent ECMO therapy for ARDS. l. Validation on a cohort of 163 patients in the emergency department and in the intensive care unit (ICU). m. Validation on a cohort of 300 patients in the surgical and medical ICUs. n. Validation on a cohort of COVID-19 patients (n = 103) and subgroup (n = 57) who received intensified thromboprophylaxis. o. Validation on a cohort of 3,008 patients who admitted to surgical ICU. p. Validation on a cohort of 166 patients who received VV-ECMO for acute respiratory failure (ARF). q. Validation on a cohort of 161 patients who received ECMO therapy in the ICU. r. Validation on a cohort of 244 patients who received VA-ECMO therapy. s. Validation on a cohort of 43,823 patients who enrolled in MIMIC-III database. t. Validation on a cohort of 78 patients who received ECMO support

Supplementary Table 7. Youden index thresholds for each machine learning models

| <b>Models</b>             | <b>Youden index thresholds</b> |
|---------------------------|--------------------------------|
| Logistic Regression       | 0.51                           |
| Support Vector Machine    | 0.55                           |
| Random Forest             | 0.55                           |
| Extreme Gradient Boosting | 0.61                           |
| Light Gradient Boosting   | 0.57                           |
| Multilayer Perceptron     | 0.49                           |

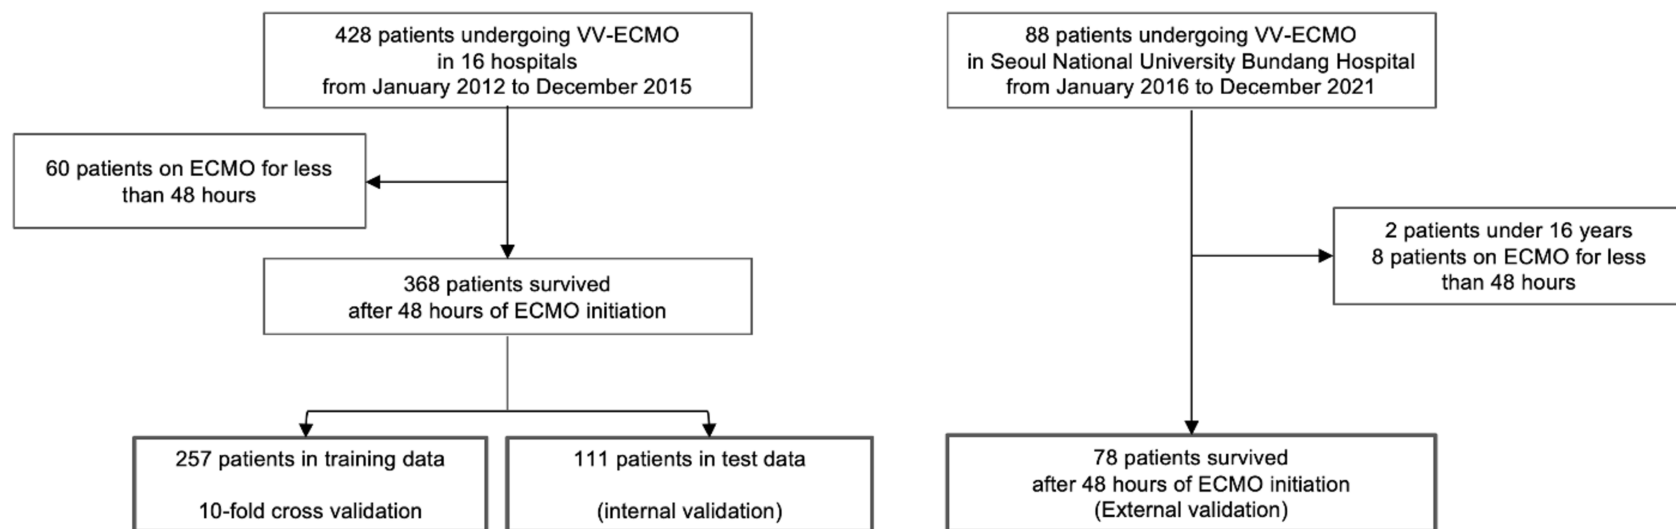

Supplementary Figure 1. Enrollment of study population



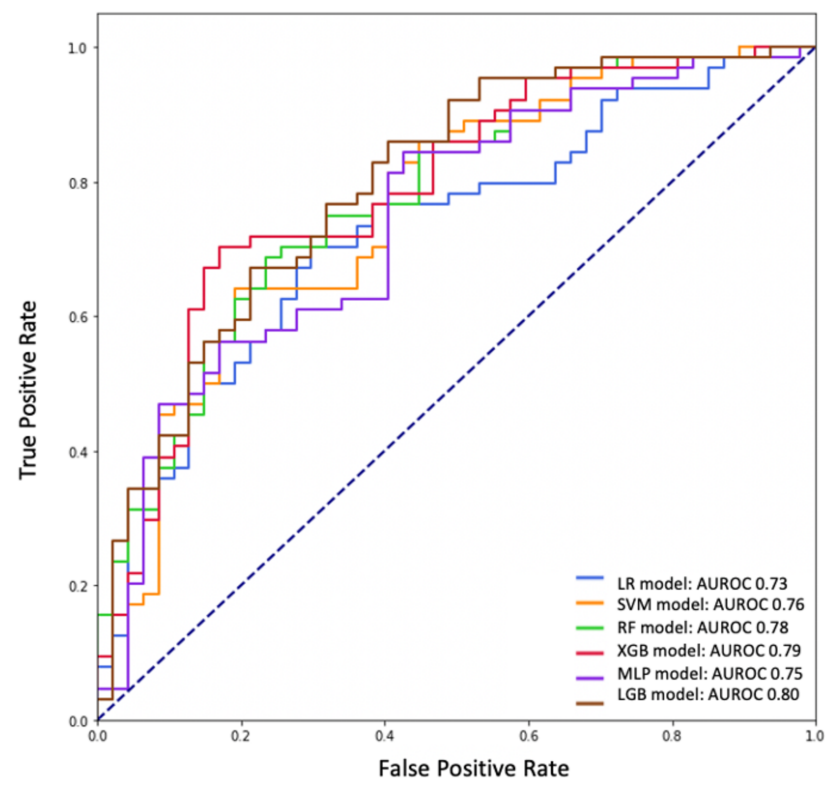

Supplementary Figure 2. Discrimination performance of prediction models with all features for 90-day mortality

AUROC: Area Under Receiver-operating characteristics

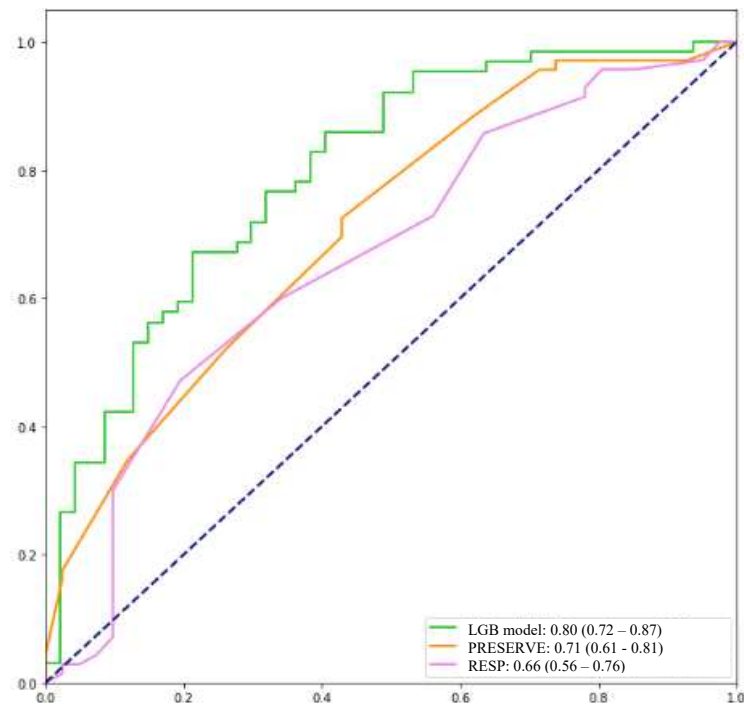

Supplementary Figure 3. Receiver operating curve comparing 90-day mortality prediction (LGB) model with all features and the RESP and PRESERVE scores applied to the testing cohort

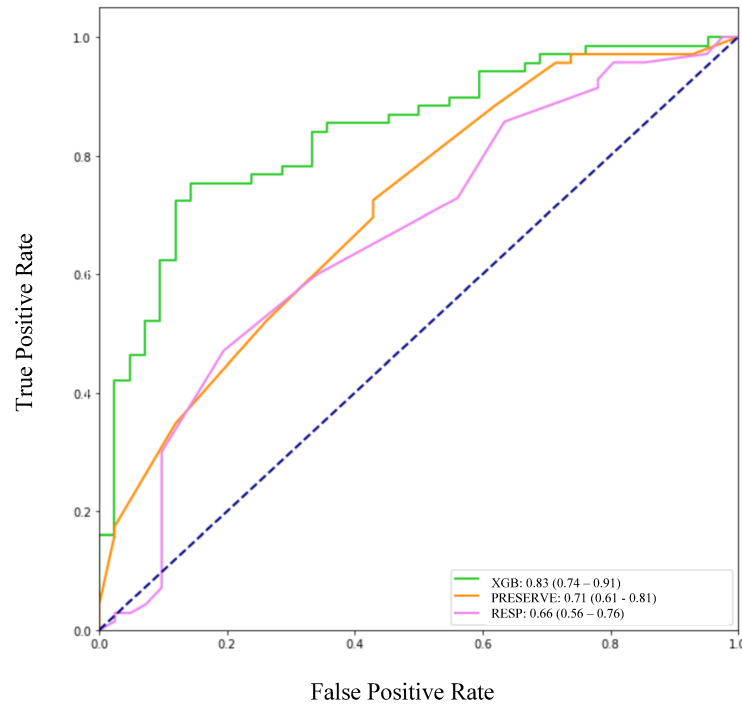

a. model with all features

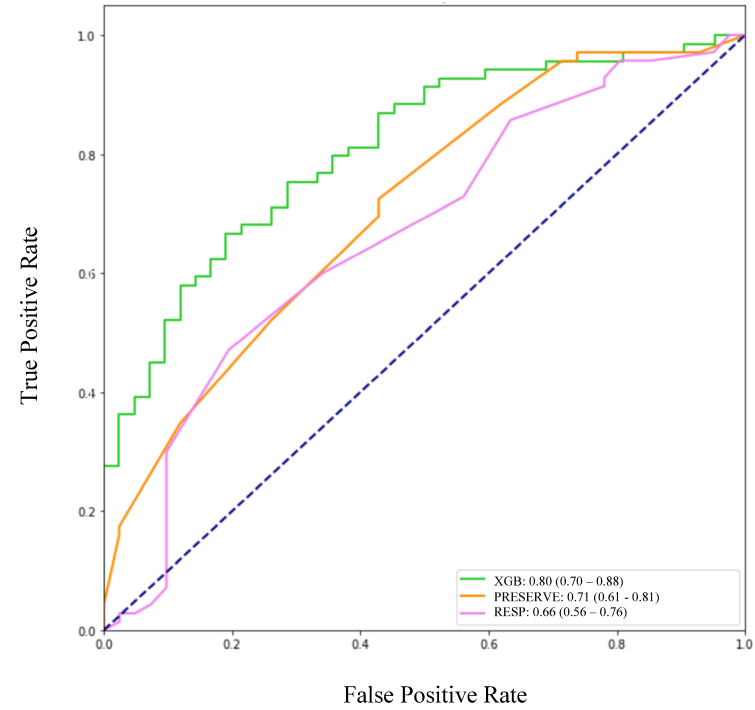

b. model with EHR features

Supplementary Figure 4. Receiver operating curve comparing in-hospital mortality prediction (XGB) model with the RESP and PRESERVE scores applied to the testing cohort

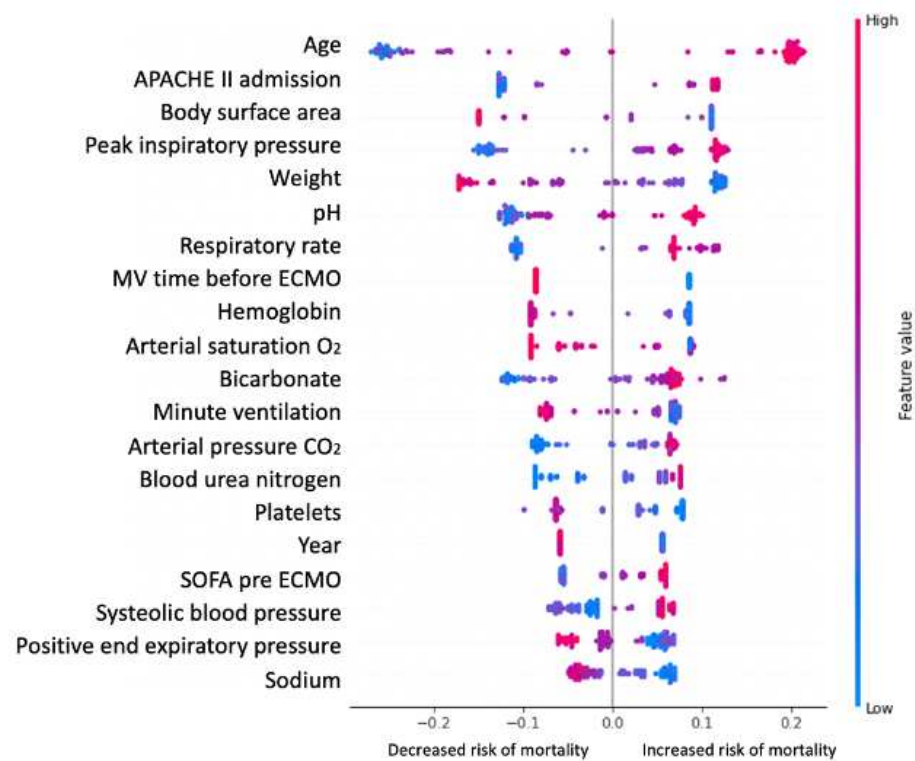

Supplementary Figure 5. SHAP analysis of 90-day mortality prediction with all features

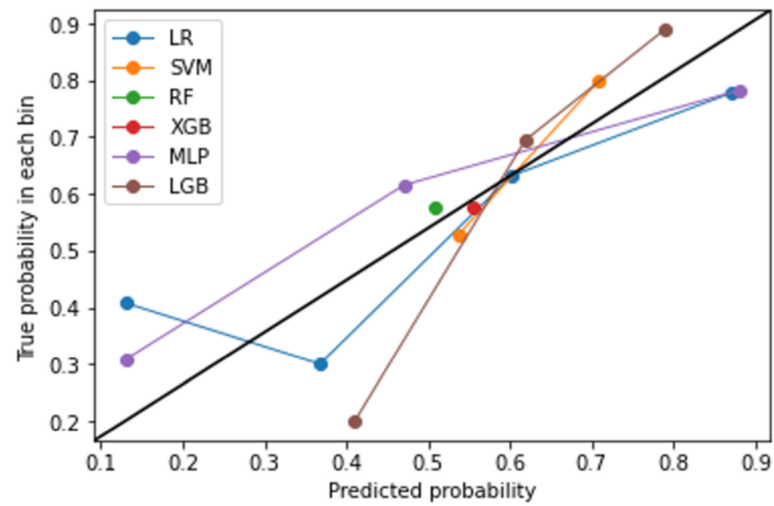

Supplementary Figure 6. Calibration performance of 90-day mortality prediction models with all features

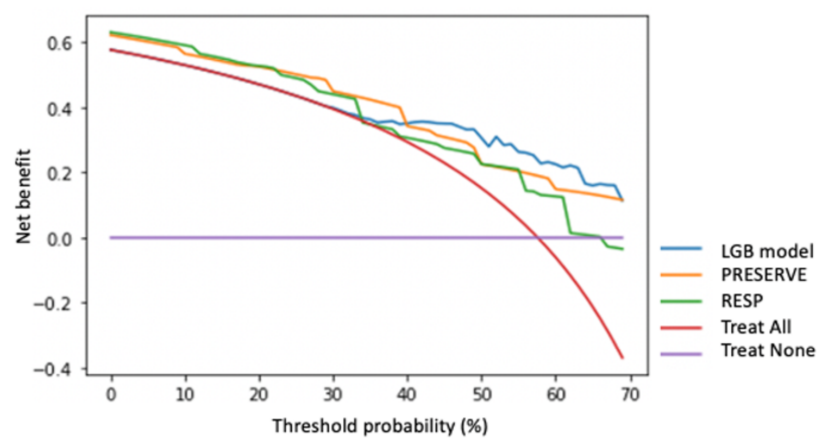

a. Model with all features

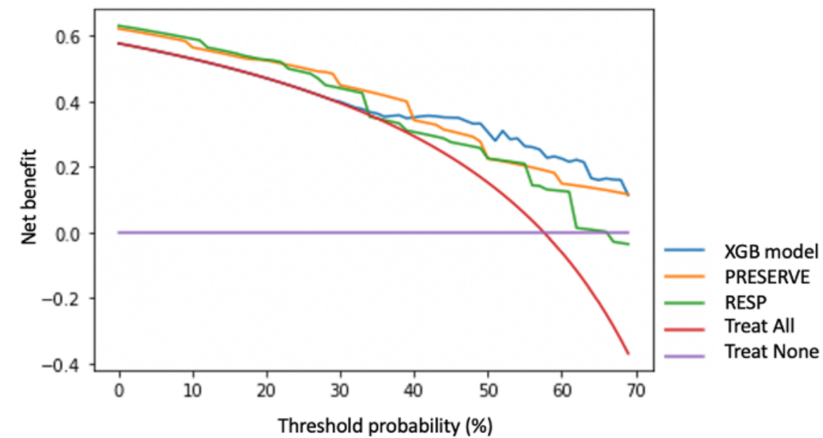

b. Model with EHR features

Supplementary Figure 7. Decision curve analysis of 90-day mortality prediction model with RESP and PRESERVE

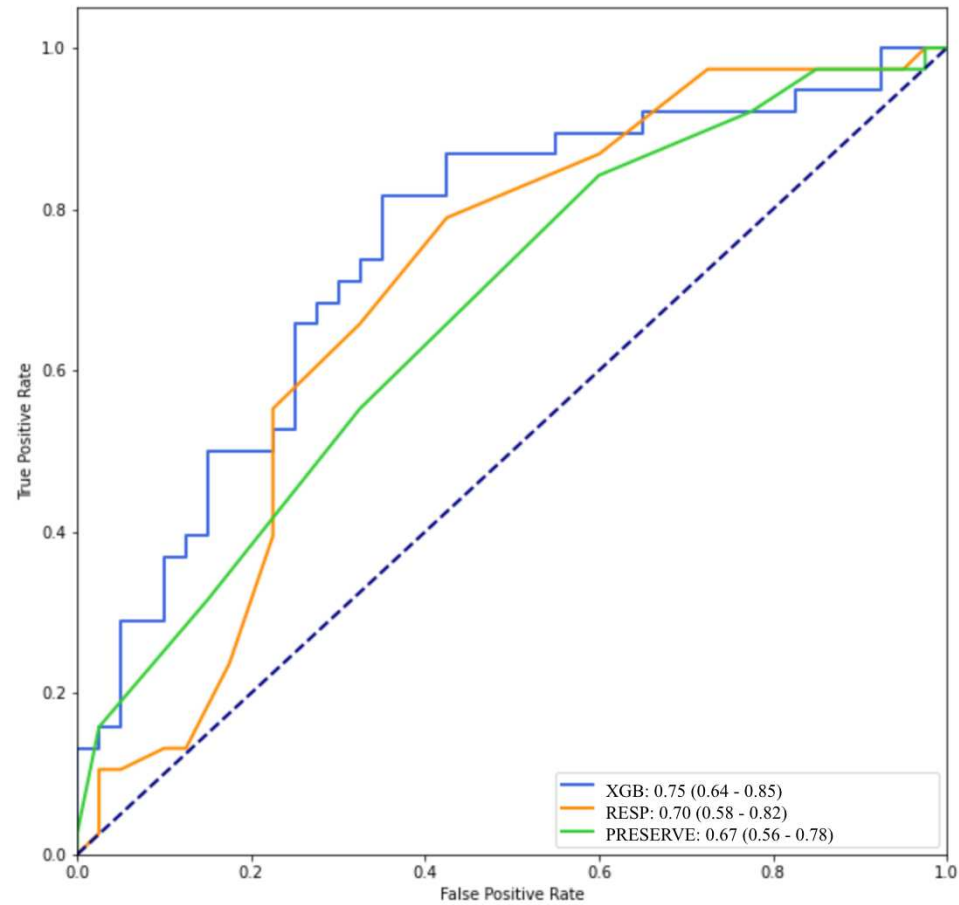

Supplementary Figure 8. External validation of 90-day mortality prediction model with EHR features with conventional models.

ROC: Receiver-operating characteristics

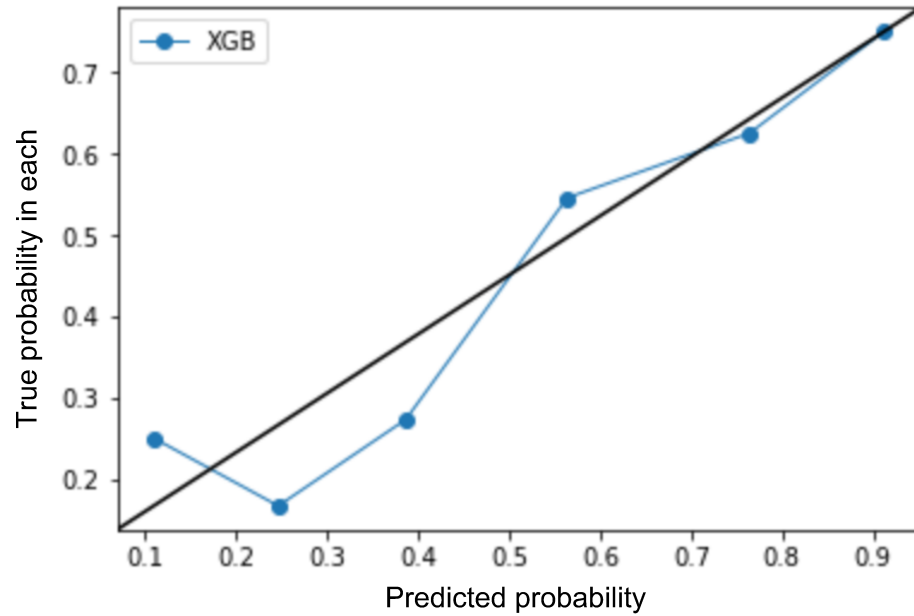

Supplementary Figure 9. Calibration performance of 90-day mortality prediction model with EHR features in the external validation set



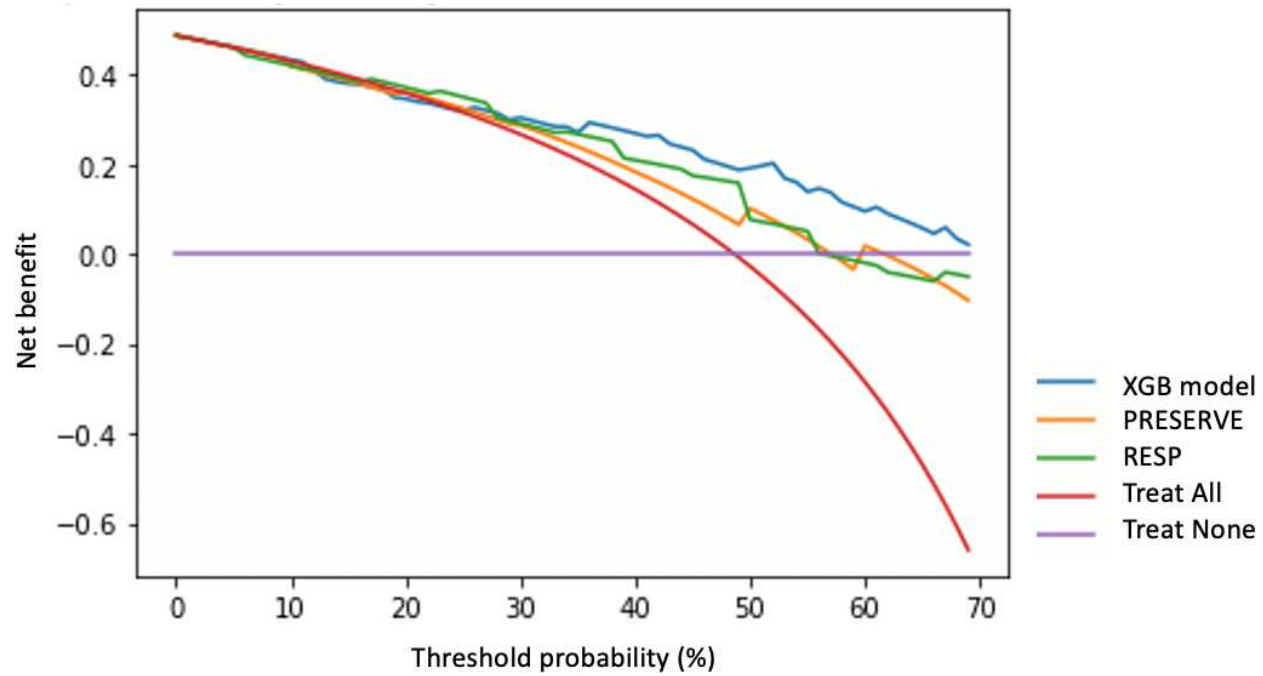

Supplementary Figure 10. External validation of 90-day mortality prediction model with EHR features using decision curve analysis
